# Supplementary material for: AI-based automation of enrollment criteria and endpoint assessment in clinical trials in liver diseases
Source: Springer Nature journal article supplement (doi:10.1038/s41591-024-03172-7), 2024-08-07
Supplement: MOESM1 [file 41591_2024_3172_MOESM1_ESM.pdf]

# AI-based automation of enrollment criteria and endpoint assessment in clinical trials in liver diseases

---

In the format provided by the  
authors and unedited

**Supplementary Table 1.** Model development and test dataset characteristics.

| Dataset                       | Trial Phase | Number of WSIs (H&E, MT) | Drug class                                                 | Enrollment criteria                                                                                | NCT registration number |
|-------------------------------|-------------|--------------------------|------------------------------------------------------------|----------------------------------------------------------------------------------------------------|-------------------------|
| Model development datasets    |             |                          |                                                            |                                                                                                    |                         |
| 1                             | 3           | 2188, 2188               | ASK1 inhibitor                                             | MASH diagnosis; fibrosis F3 <sup>15</sup>                                                          | NCT03053050             |
| 2                             | 3           | 2488, 2478               | ASK1 inhibitor                                             | MASH diagnosis; fibrosis F4 <sup>15</sup>                                                          | NCT03053063             |
| 3                             | 2b          | 528, 528                 | Monoclonal antibody directed against LOXL2                 | MASH defined as steatosis > 5% with associated lobular inflammation: Ishak stage 3,4 <sup>16</sup> | NCT01672866             |
| 4                             | 2b          | 561, 554                 | Monoclonal antibody directed against LOXL2                 | MASH diagnosis; Ishak stage 5,6 <sup>17</sup>                                                      | NCT01672879             |
| 5                             | 2           | 158, 163                 | ASK1 Inhibitor, monoclonal antibody directed against LOXL2 | Evidence of MASH with fibrosis on biopsy <sup>18</sup>                                             | NCT02466516             |
| 6                             | 2           | 312, 312                 | PPAR $\delta$ agonist                                      | Definite MASH; MAS $\geq 4$ with 1 per component; fibrosis F1, F2, F3 <sup>21</sup>                | NCT03551522             |
| 7                             | 3           | 1477, 766                | Nucleotide analogue (antiviral)                            | HBV <sup>19</sup>                                                                                  | NCT00117676             |
| 8                             | 3           | 851, 415                 | Nucleotide analogue (antiviral)                            | HBV <sup>19</sup>                                                                                  | NCT00116805             |
| 9                             | 2b          | 331, 333                 | Monoclonal antibody directed against LOXL2                 | PSC <sup>20</sup>                                                                                  | NCT01672853             |
| Analytic performance test set |             |                          |                                                            |                                                                                                    |                         |
| 10                            | 2b          | 639, 633                 | Insulin sensitizer                                         | Definite MASH; MAS $\geq 4$ with 1 per component; Fibrosis F1, F2, F3 <sup>22</sup>                | NCT02784444             |
| 11                            | 2b          | 938, 945                 | ASK1 inhibitor, ACC inhibitor, FXR agonist                 | MASH diagnosis; fibrosis F3 or F4 <sup>25</sup>                                                    | NCT03449446             |

ASK1, apoptosis signal-regulating kinase 1 (also known as mitogen-activated protein kinase kinase

kinase 5); ACC, Acetyl-CoA Carboxylase; F, fibrosis stage; FXR, farnesoid X receptor; HBV, hepatitis B virus; H&E, hematoxylin and eosin; LOXL2, lysyl oxidase-like 2; MT, Masson's trichrome; MAS, metabolic dysfunction-associated steatotic liver disease Activity Score; MASH, metabolic dysfunction-associated steatohepatitis; PPAR $\delta$ , peroxisome proliferator activated receptor delta; PSC, primary sclerosing cholangitis; WSI, whole slide image.

**Supplementary Table 2.** Algorithm repeatability assessment using 10 independent reads per WSI.

|                      | Number of WSIs | Model versus model agreement rate |
|----------------------|----------------|-----------------------------------|
| Steatosis            | 639            | 100%                              |
| Lobular inflammation | 639            | 100%                              |
| Ballooning           | 639            | 100%                              |
| Fibrosis             | 633            | 100%                              |

WSI, whole slide image.

**Supplementary Table 3.** Correlations between the AI-derived continuous scoring system and comparable noninvasive tests. Values were derived from Kendall's tau rank correlation analysis. FDR correction of p-values was performed using the Benjamini-Hochberg procedure.

| Continuous scoring system             | NIT                                    | Kendall's Tau | P value  | n   |
|---------------------------------------|----------------------------------------|---------------|----------|-----|
| Continuous fibrosis stage             | FibroScan                              | 0.33          | 2.49E−11 | 188 |
| Continuous fibrosis stage             | FIB4                                   | 0.23          | 1.56E−06 | 207 |
| Continuous fibrosis stage             | ELF                                    | 0.22          | 2.52E−06 | 210 |
| Continuous fibrosis stage             | TIMP1                                  | 0.11          | 2.01E−02 | 210 |
| Continuous fibrosis stage             | PIIINP                                 | 0.14          | 3.03E−03 | 210 |
| Continuous fibrosis stage             | MRI-PDFF                               | −0.11         | 2.36E−01 | 59  |
| Continuous fibrosis stage             | Morphometric quantitative collagen (%) | 0.56          | 2.20E−32 | 205 |
| Continuous steatosis grade            | MRI-PDFF                               | 0.52          | 4.83E−09 | 59  |
| Continuous steatosis grade            | Morphometric quantitative collagen (%) | −0.16         | 5.42E−04 | 205 |
| Continuous lobular inflammation grade | C-reactive protein                     | 0.13          | 5.04E−03 | 211 |
| Continuous lobular inflammation grade | Adiponectin                            | −0.15         | 1.38E−03 | 211 |
| Continuous ballooning grade           | HbA1C                                  | 0.16          | 8.36E−04 | 211 |

AI, artificial intelligence; ELF, enhanced liver fibrosis test; FIB4, fibrosis-4; HbA1C, hemoglobin A1c; MRI-PDFF, magnetic resonance imaging derived proton density fat fraction; NIT, noninvasive test; PIIINP, procollagen III N-terminal peptide; Kendall's Tau, Kendall's rank correlation coefficient for ordinal scores; TIMP, tissue inhibitor of metalloproteinase; TIMP1, TIMP metalloproteinase inhibitor 1.

**Supplementary Table 4.** Deployment of AIM-MASH in retrospective analyses of Phase 2/2b clinical trial cohorts.

| NCT<br>(Phase)               | Inclusion<br>Criteria (CRN<br>Fibrosis +<br>MAS)                    | Drug Class<br>*                                                  | N                   | NITs<br>Used<br>** | Reader<br>Approach                      | Ref.                                          | Surrogate Histologic Endpoints (SHE)<br>+ Exploratory Results |                                                                                                                                                                                                         |                       |
|------------------------------|---------------------------------------------------------------------|------------------------------------------------------------------|---------------------|--------------------|-----------------------------------------|-----------------------------------------------|---------------------------------------------------------------|---------------------------------------------------------------------------------------------------------------------------------------------------------------------------------------------------------|-----------------------|
|                              |                                                                     |                                                                  |                     |                    |                                         |                                               |                                                               | Met by<br>AIM-<br>MASH                                                                                                                                                                                  | Met by<br>Pathologist |
| NCT039874<br>51 (Phase<br>2) | Histologic<br>evidence of<br>MASH with F4<br>fibrosis and<br>MAS >3 | GLP-1<br>agonist/<br>insulin<br>regulation<br>and weight<br>loss | BL:70<br>W48:70     | MRI-<br>PDFF       | Single<br>pathologist<br>score          | <a href="#">Poster</a>                        | SHE1                                                          | Not<br>assessed                                                                                                                                                                                         | No                    |
|                              |                                                                     |                                                                  |                     |                    |                                         |                                               | SHE2                                                          | Not<br>assessed                                                                                                                                                                                         | No                    |
|                              |                                                                     |                                                                  |                     |                    |                                         |                                               | Exploratory                                                   | Reduction in steatosis<br>consistent between AIM-<br>MASH and MRI-PDFF<br>measurement                                                                                                                   |                       |
| NCT039874<br>51 (Phase<br>2) | Histologic<br>evidence of<br>MASH with F4<br>fibrosis and<br>MAS >3 | GLP-1<br>agonist/<br>insulin<br>regulation<br>and weight<br>loss | BL:70<br>W48:70     | MRI-<br>PDFF       | Single<br>pathologist<br>score          | <a href="#">Poster</a>                        | Exploratory                                                   | AIM-MASH reported lower<br>placebo response than<br>pathologist; Good<br>agreement between AIM-<br>MASH and pathologist<br>scoring of change in<br>fibrosis, inflammation,<br>ballooning, and steatosis |                       |
| NCT029709<br>42<br>(Phase 2) | Histologic<br>evidence of<br>MASH with<br>fibrosis F1 to<br>F3      | GLP-1<br>agonist/<br>insulin<br>regulation<br>and weight<br>loss | BL: 320<br>W72:251  | Not<br>assessed    | Pathologist<br>consensus<br>score (N=2) | <a href="#">Poster</a>                        | SHE1                                                          | Yes                                                                                                                                                                                                     | Yes                   |
|                              |                                                                     |                                                                  |                     |                    |                                         |                                               | SHE2                                                          | No                                                                                                                                                                                                      | No                    |
|                              |                                                                     |                                                                  |                     |                    |                                         |                                               | Exploratory                                                   | Dose dependent drug<br>effect seen with<br>pathologist and AIM-<br>MASH scoring; AIM-<br>MASH continuous scores<br>detected significant<br>change in fibrosis<br>compared to placebo                    |                       |
| NCT039004<br>29 (Phase<br>3) | Adults with<br>≥3 metabolic<br>risk factors,<br>liver stiffness     | THR-β<br>agonist/<br>steatosis<br>reduction                      | BL: 782<br>W52: 777 | Not<br>assessed    | Pathologist<br>consensus<br>score (N=2) | Reference<br>33<br><br><a href="#">Poster</a> | SHE1                                                          | Yes                                                                                                                                                                                                     | Yes                   |

|                        |                                                                                                                                       |                                                  |                   |                         |                                    |                                        |             |                                                                                                                                                                                                                                                                                                    |              |
|------------------------|---------------------------------------------------------------------------------------------------------------------------------------|--------------------------------------------------|-------------------|-------------------------|------------------------------------|----------------------------------------|-------------|----------------------------------------------------------------------------------------------------------------------------------------------------------------------------------------------------------------------------------------------------------------------------------------------------|--------------|
|                        | ≥8.5kPa, hepatic fat ≥8%, biopsy-confirmed MASH with F1B-F3 fibrosis, and a metabolic dysfunction-associated steatohepatitis (MAS) ≥4 |                                                  |                   |                         |                                    |                                        | SHE2        | Yes                                                                                                                                                                                                                                                                                                | Yes          |
|                        |                                                                                                                                       |                                                  |                   |                         |                                    |                                        | Exploratory | Not assessed                                                                                                                                                                                                                                                                                       | Not assessed |
| NCT03551522 (Phase 2)  | Histologic evidence of MASH with fibrosis F1 to F3 and MAS ≥ 4 with a score of at least 1 for each MAS component                      | PPARδ agonist/ reduce steatosis and inflammation | BL:152            | MRI-PDFF                | Pathologist consensus scores (N=2) | Reference 34<br><a href="#">Poster</a> | SHE1        | Not assessed                                                                                                                                                                                                                                                                                       | Not assessed |
|                        |                                                                                                                                       |                                                  |                   |                         |                                    |                                        | SHE2        | Not assessed                                                                                                                                                                                                                                                                                       | Not assessed |
|                        |                                                                                                                                       |                                                  |                   |                         |                                    |                                        | Exploratory | AIM-MASH quantified MASH histologic features plus interface hepatitis and portal inflammation in BL biopsies                                                                                                                                                                                       |              |
| NCT03486899 (Phase 2b) | Histologic evidence of MASH with fibrosis F3 and NAS score of > 1 for each MAS component                                              | FGF21 analog/ steatosis reduction                | BL:197<br>W24:197 | MRE<br>MRI-PDFF         | Single pathologist score           | Reference 35<br><a href="#">Poster</a> | SHE1        | No                                                                                                                                                                                                                                                                                                 | No           |
|                        |                                                                                                                                       |                                                  |                   |                         |                                    |                                        | SHE2        | No                                                                                                                                                                                                                                                                                                 | No           |
|                        |                                                                                                                                       |                                                  |                   |                         |                                    |                                        | Exploratory | AIM-MASH and pathologist scoring both showed improvement for ballooning and lobular inflammation, fibrosis in treated arm; Correlations between AIM-MASH and NITs found; AIM-MASH continuous scores showed statistically significant improvement in all MAS components from BL compared to placebo |              |
| NCT02912260 (Phase 2)  | Histologic evidence of MASH with fibrosis F1 to F3 and MAS ≥ 4 with a score of at least 1 for each MAS                                | THR-β agonist/ steatosis reduction               | BL:104<br>W36:104 | MRI-PDFF, FIB-4, ELF TE | Pathologist consensus score (N=2)  | Reference 36<br><a href="#">Poster</a> | SHE1        | Yes                                                                                                                                                                                                                                                                                                | Yes          |
|                        |                                                                                                                                       |                                                  |                   |                         |                                    |                                        | SHE2        | Yes                                                                                                                                                                                                                                                                                                | Yes          |

|  |           |  |  |  |  |  |             |                                                                                                                                                                       |
|--|-----------|--|--|--|--|--|-------------|-----------------------------------------------------------------------------------------------------------------------------------------------------------------------|
|  | component |  |  |  |  |  | Exploratory | AIM-MASH continuous steatosis, ballooning, lobular inflammation scoring correlates with MRI-PDFF; AIM-MASH area of portal inflammation correlates with FIB-4, ELF, TE |
|--|-----------|--|--|--|--|--|-------------|-----------------------------------------------------------------------------------------------------------------------------------------------------------------------|

SHE 1: Resolution of steatohepatitis on overall histopathological reading and no worsening of liver fibrosis on MASH CRN fibrosis score. Resolution of steatohepatitis is defined as absent fatty liver disease or isolated or simple steatosis without steatohepatitis and a MAS score of 0–1 for inflammation, 0 for ballooning, and any value for steatosis

SHE2: Improvement in liver fibrosis greater than or equal to one stage (MASH CRN fibrosis score) and no worsening of steatohepatitis (defined as no increase in MAS for ballooning, inflammation, or steatosis)

Exploratory Results: Retrospective exploratory investigation using AIM-MASH in collaboration with study sponsors

MASH, metabolic dysfunction-associated steatohepatitis; MAS, metabolic dysfunction-associated steatotic liver disease Activity Score; BL, Baseline; W, Week.

#### \*Drug Classes

GLP-1, glucagon-like peptide-1 receptor; THR- $\beta$ , thyroid hormone receptor  $\beta$ ; FGF21, fibroblast growth factor 21; PPAR $\delta$ , peroxisome proliferator activated receptor delta

\*\*MRI-PDFF, magnetic resonance imaging proton density fat fraction; FIB-4, fibrosis-4; ELF, enhanced liver function; TE, transient elastography; MRE, magnetic resonance elastography



**Supplementary Table 5.** Example instructions for the interpretations of histologic features.

| <b>Histologic feature</b>       | <b>Example instructions</b>                                                                                                                                                                            |
|---------------------------------|--------------------------------------------------------------------------------------------------------------------------------------------------------------------------------------------------------|
| Lobular inflammation            | Place label regions containing at least three inflammatory cells, not including those within sinusoids. Do not label regions of portal inflammation with this region label.                            |
| Hepatocyte ballooning           | Please use this label on regions of hepatocellular ballooning. Hepatocellular ballooning is defined as round cells with rarified cytoplasm that are at least 50% larger than neighboring normal cells. |
| Steatosis                       | Please use this label on regions of dense steatosis.                                                                                                                                                   |
| Thick pathologic fibrotic septa | Please use this label for thickened fibrotic septae extending from portal and central regions considered when staging liver biopsies.                                                                  |
| Portal tract (normal)           | Please use this label for normal-appearing, small-/medium-sized portal regions, not expanded by fibrosis or inflammation.                                                                              |
| Portal tract (abnormal)         | Please use this label for portal regions expanded by inflammation, fibrosis, bile ductular proliferation, or any combination of the above.                                                             |
| Large normal septa              | Please use this label for larger intrahepatic normal septae (usually containing larger arteries, veins, and bile ducts) that would not be included when staging liver biopsies.                        |
| Subcapsular fibrosis            | Please use this label for normal subcapsular regions of fibrosis not considered when staging liver biopsies.                                                                                           |

**Supplementary Table 6.** AI-derived models, input substances, and objectives for application.

| Model name             | Major input substances                                                                                                                                                                                                                              | Objectives                                                                                                                                 |
|------------------------|-----------------------------------------------------------------------------------------------------------------------------------------------------------------------------------------------------------------------------------------------------|--------------------------------------------------------------------------------------------------------------------------------------------|
| Artifact models        | Background, blur artifact, bad stain artifact, black spots, bubble, cautery, crushed tissue, hair, margin ink, marker tape, skin cell, tissue fold, rainbow pattern artifact                                                                        | Remove unwanted regions of WSI that should be excluded from downstream analysis                                                            |
| MT tissue models       | Lumen, blood vessel, bile duct, cirrhotic septal portal fibrosis, hilar fibrosis, large septal area, perisinusoidal fibrosis, septal fibrosis, subcapsular fibrosis, thick fibrotic septae, normal portal area, normal portal triad, fibrosis       | Detect fibrosis regions to identify and quantify features of interest                                                                      |
| MT large septae models | Normal portal area, normal portal triad, perisinusoidal fibrosis, thick fibrotic septae                                                                                                                                                             | Detect regions of pathological fibrosis                                                                                                    |
| H&E tissue models      | Lobular Inflammation, portal inflammation, interface hepatitis, bile duct, blood vessel, Normal hepatocytes, hepatocellular swelling, hepatocellular ballooning, steatosis, microvesicular steatosis                                                | Detect macrovesicular steatosis, hepatocellular ballooning, and lobular inflammation regions to identify and quantify features of interest |
| H&E GNN models         | <i>Overlays from H&amp;E tissue model:</i><br>Lobular inflammation, portal inflammation, interface hepatitis, bile duct, blood vessel, normal hepatocytes, hepatocellular, swelling, hepatocellular ballooning, steatosis, microvesicular steatosis | Compute slide-level MASH CRN ordinal grades                                                                                                |
| MT GNN models          | <i>Overlays from MT large septae model:</i><br>Large septae, pathological fibrosis, other tissue<br><i>Overlays from MT tissue model:</i><br>Fibrosis, bile duct, blood vessel, other tissue                                                        | Compute slide-level MASH CRN ordinal stage                                                                                                 |

CRN, Clinical Research Network; GNN, graph neural network; H&E, hematoxylin and eosin; MT, Masson's trichrome; MASH, metabolic dysfunction-associated steatohepatitis; WSI, whole slide image

**Supplementary Table 7.** Description of models.

| Model Name                                      | Purpose                                                                                                             | Model Input<br>(during inference) | Model Output                                                                                                                                                                                                                                                                                                                                          |
|-------------------------------------------------|---------------------------------------------------------------------------------------------------------------------|-----------------------------------|-------------------------------------------------------------------------------------------------------------------------------------------------------------------------------------------------------------------------------------------------------------------------------------------------------------------------------------------------------|
| <b>Segmentation Models</b>                      |                                                                                                                     |                                   |                                                                                                                                                                                                                                                                                                                                                       |
| Model 1: Artifact Model                         | To remove unwanted regions which should not even be considered as input for other models                            | H&E Whole Slide Image             | Output is a 3D matrix of class probabilities for each pixel in the WSI. Artifact segmentation classes: Usable tissue, Artifact area, and Background area.                                                                                                                                                                                             |
| Model 2: H&E Tissue Model                       | Detect steatosis, hepatocellular ballooning, lobular inflammation regions and other to compute features of interest | H&E Whole Slide Image             | Output is a 3D matrix of class probabilities for each pixel in the WSI. H&E segmentation classes: Lobular Inflammation, Portal Inflammation, Interface Hepatitis, Bile Duct, Blood Vessel, Normal Hepatocytes, Hepatocellular Swelling, Hepatocellular Ballooning, Steatosis, Microvesicular Steatosis, Normal Interface and Other/remaining Tissue . |
| Model 3a: Trichrome Tissue Model                | Detect fibrosis region to compute features of interest                                                              | Trichrome Whole Slide Image       | Output is a 3D matrix of class probabilities for each pixel in the WSI. Trichrome segmentation classes: Collagen/Fibrosis, Bile Duct, Lumen, Blood Vessel and Other/remaining Tissue                                                                                                                                                                  |
| Model 3b: Trichrome Pathological Fibrosis Model | Detect pathological fibrosis region in all fibrosis area                                                            | Trichrome Whole Slide Image       | Output is a 3D matrix of class probabilities for each pixel in the WSI. Trichrome Pathological Fibrosis segmentation classes: Pathological Fibrosis, Normal Collagen and Other/remaining Tissue                                                                                                                                                       |
| <b>Graph Neural Networks</b>                    |                                                                                                                     |                                   |                                                                                                                                                                                                                                                                                                                                                       |
| Model 4a: H&E GNN Model - Steatosis             | Compute slide-level MAS ordinal scores for Steatosis                                                                | Raw model output from Model 2     | Output is a single integer score for Steatosis (values in the range of 0-3)                                                                                                                                                                                                                                                                           |

|                                                      |                                                                      |                                              |                                                                                             |
|------------------------------------------------------|----------------------------------------------------------------------|----------------------------------------------|---------------------------------------------------------------------------------------------|
| Model 4b: H&E<br>GNN<br>Model - Ballooning           | Compute slide-level MAS ordinal scores for Hepatocellular Ballooning | Raw model output from Model 2                | Output is a single integer score for Hepatocellular Ballooning (values in the range of 0-2) |
| Model 4c: H&E<br>GNN<br>Model - Lobular Inflammation | Compute slide-level MAS ordinal scores for Lobular Inflammation      | Raw model output from Model 2                | Output is a single integer score for Lobular Inflammation (values in the range of 0-3)      |
| Model 5:<br>Trichrome GNN<br>Model                   | Compute slide-level CRN ordinal score                                | Raw model outputs from Model 3a and Model 3b | Output is a single integer score for CRN score (values in the range of 0-4)                 |

**Supplementary Table 8.** Training parameters for H&E, trichrome, and artifact models.

|                          |                            | <b>Artifact Model</b> | <b>H&amp;E Tissue Model</b> | <b>Trichrome Tissue Model</b> | <b>Trichrome Large Septae Model</b> |
|--------------------------|----------------------------|-----------------------|-----------------------------|-------------------------------|-------------------------------------|
| Learning Rate Parameters | Base Learning Rate         | 0.001                 | 0.0001                      | 0.0001                        | 0.001                               |
|                          | Learning Rate Scheduler    | Staircase             | Staircase                   | Staircase                     | Staircase                           |
|                          | Learning Rate Decay Factor | 0.5                   | 0.5                         | 0.5                           | 0.5                                 |
|                          | Learning Rate Decay Steps  | 2500                  | 10000                       | 10000                         | 5000                                |
| Batch Size               | Train Batch Size           | 34                    | 100                         | 100                           | 42                                  |
| Batch Norm               | Momentum Value             | 0.6                   | 0.6                         | 0.6                           | 0.6                                 |
| Optimizer                | Optimizer Name             | Adam                  | Adam                        | Adam                          | Adam                                |
|                          | Optimizer Epsilon          | 1e-4                  | 1e-4                        | 1e-4                          | 1e-4                                |
| Dropout                  | Dropout Probability value  | 0.5                   | 0.5                         | 0.5                           | 0.5                                 |

**Supplementary Table 9.** Training parameters for GNN models.

|                                |                                  | <b>GNN<br/>Steatosis</b> | <b>GNN<br/>Ballooning</b> | <b>GNN Lobular<br/>inflammation</b> | <b>GNN CRN<br/>Fibrosis</b> |
|--------------------------------|----------------------------------|--------------------------|---------------------------|-------------------------------------|-----------------------------|
| Learning<br>Rate<br>Parameters | Base<br>Learning<br>Rate         | 0.001                    | 0.001                     | 0.001                               | 0.001                       |
|                                | Learning<br>Rate<br>Scheduler    | Staircase                | Staircase                 | Staircase                           | Staircase                   |
|                                | Learning<br>Rate Decay<br>Factor | 0.8                      | 0.8                       | 0.8                                 | 0.8                         |
|                                | Learning<br>Rate Decay<br>Steps  | 200                      | 200                       | 200                                 | 200                         |
| Batch Size                     | Train Batch<br>Size              | 32                       | 32                        | 32                                  | 32                          |
| Optimizer                      | Optimizer<br>Name                | Adam                     | Adam                      | Adam                                | Adam                        |
|                                | Optimizer<br>betas               | 0.9 / 0.999              | 0.9 / 0.999               | 0.9 / 0.999                         | 0.9 / 0.999                 |
|                                | Optimizer<br>epsilon             | 1e-8                     | 1e-8                      | 1e-8                                | 1e-8                        |
| Dropout                        | Dropout<br>Probability<br>value  | 0.5                      | 0.5                       | 0.5                                 | 0.5                         |
| Network<br>architecture        | Hidden<br>features               | 128                      | 128                       | 128                                 | 128                         |
|                                | Layers                           | 2                        | 2                         | 2                                   | 2                           |
| Mixed effect<br>model          | Bias<br>multiplier               | 0.1                      | 0.01                      | 0.07                                | 0.1                         |
